# Supplementary material
Source: PubMed Central journal article supplement (PMC3977583)

**Figure S1.** Far-UV (Top) and near-UV (Bottom) CD spectra of Q1-VSD in LPPG micelles at pH 5.5 and 50 °C

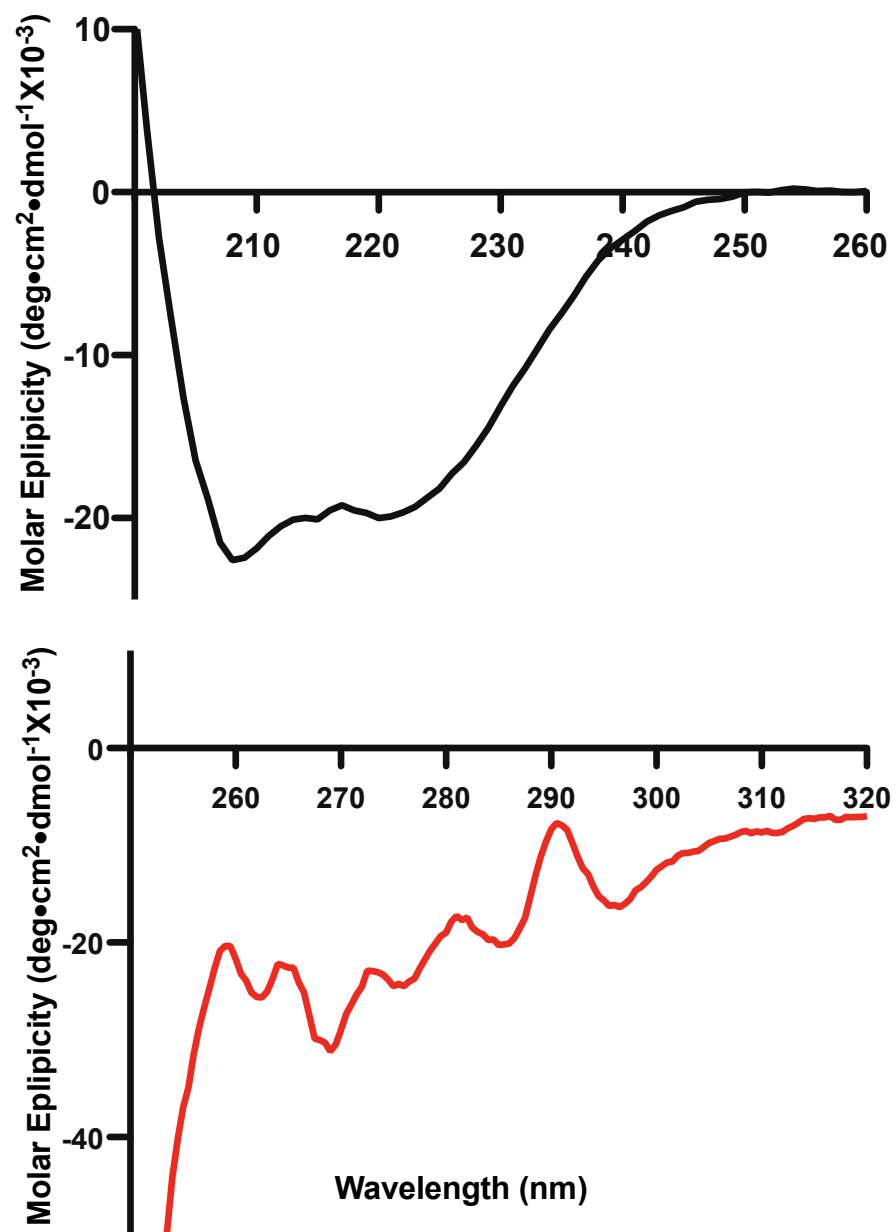

**Figure S2.** Example of sequential assignment of backbone NMR resonances for Q1-VSD in LPPG micelles. Shown are peak connectivities for sites M238-R243 based on TROSY-based **(A)** HNCA (red) and HNCOCA (black) and **(B)** HNCOC (red) and HNCACO (black) spectra.

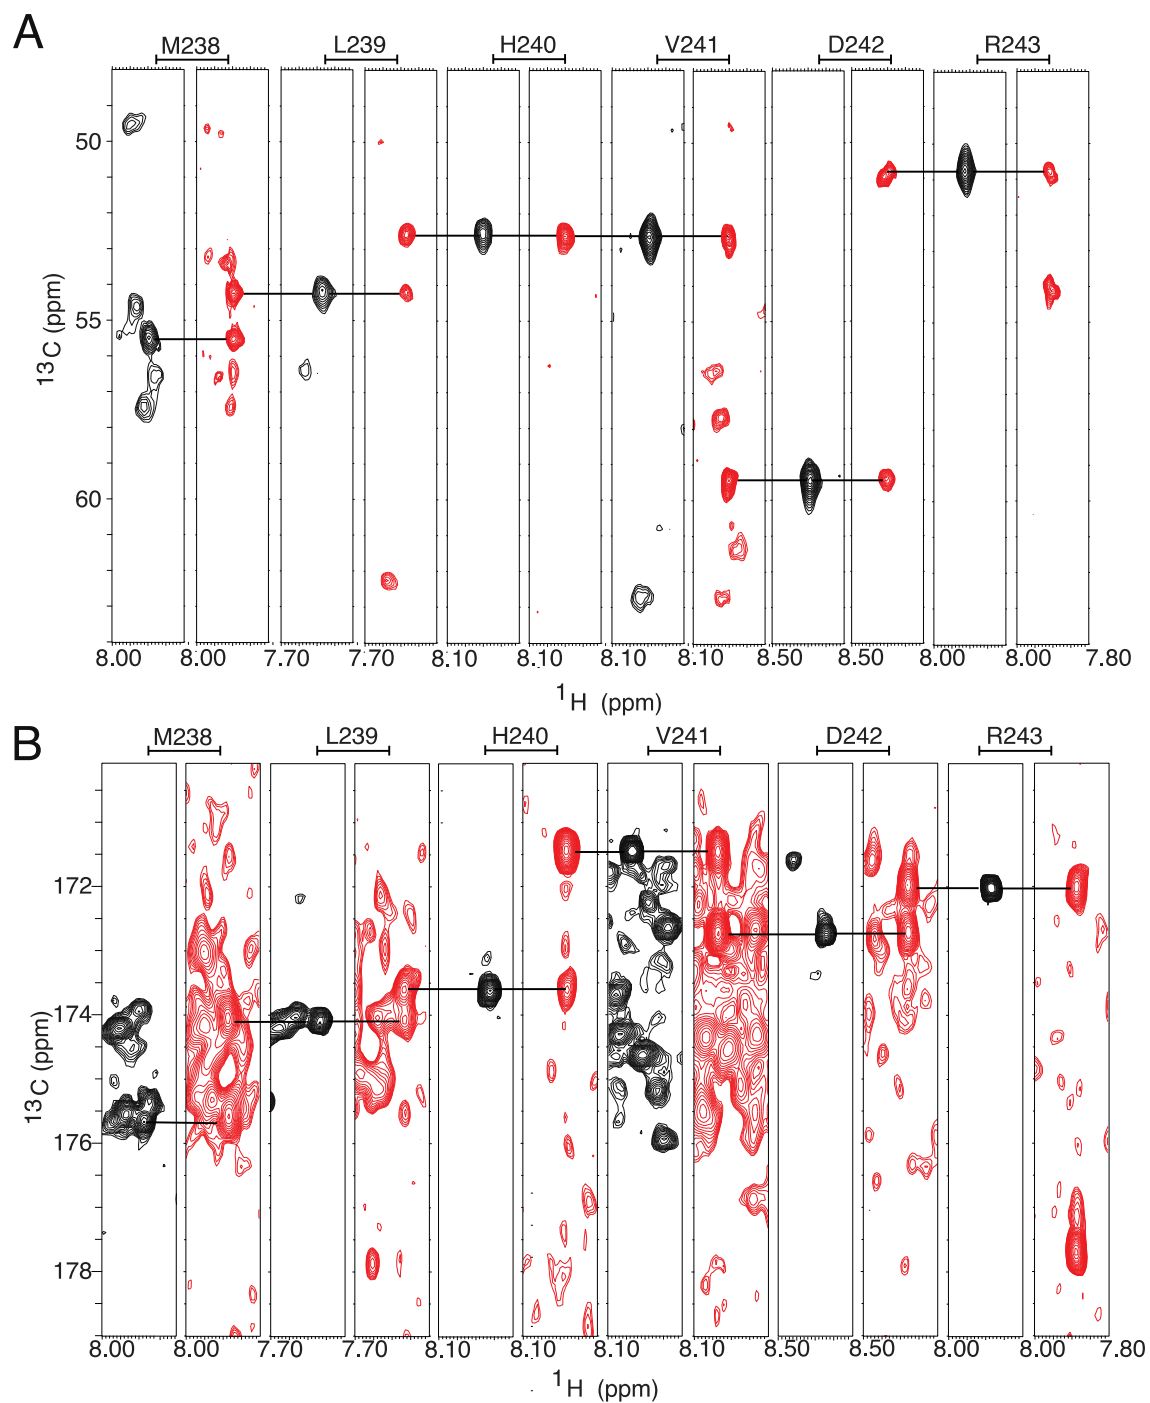

**Figure S3.**  $^1\text{H}$ ,  $^{15}\text{N}$ -TROSY spectra of amino acid-selective isotopically-labeled Q1-VSD (100-143) samples (red spectra) superimposed on the spectrum for the uniformly  $^{15}\text{N}$ -labeled Q1-VSD (black). These overlays assist in the completion of TROSY peak assignments for the following amino acid types. (A),  $^{15}\text{N}$ -Leu; (B),  $^{15}\text{N}$ -Ile; (C),  $^{15}\text{N}$ -Val; (D),  $^{15}\text{N}$ -Tyr; and (E), reverse isotopically-labeled sample ( $^{14}\text{N}$ -Arg in otherwise  $^{15}\text{N}$ -labeled protein).

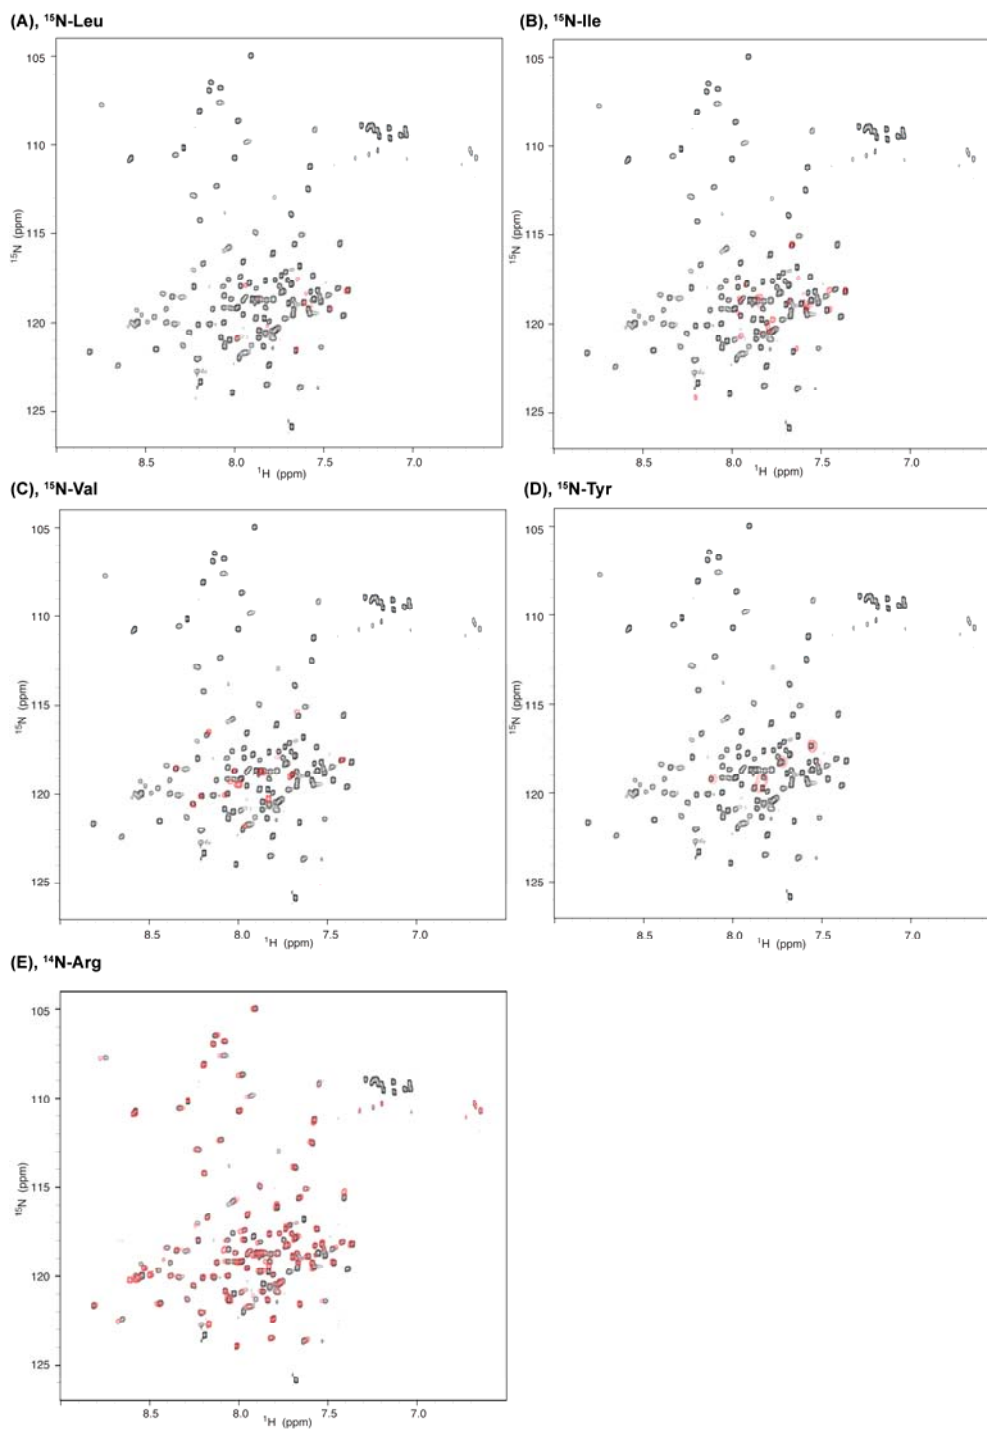

**Figure S4.** Selected 2-D slices from a 3-D NOESY-TROSY NMR spectrum of wild type VSD, showing use of this data in making or confirming backbone amide peak assignments.

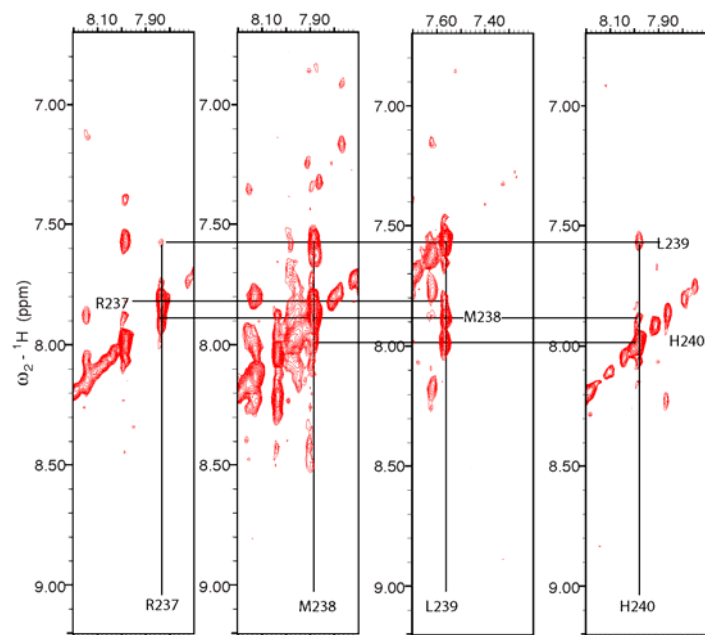

Supplement: bi500102w_si_001.pdf [file bi500102w_si_001.pdf]
